# Psychiatric Services

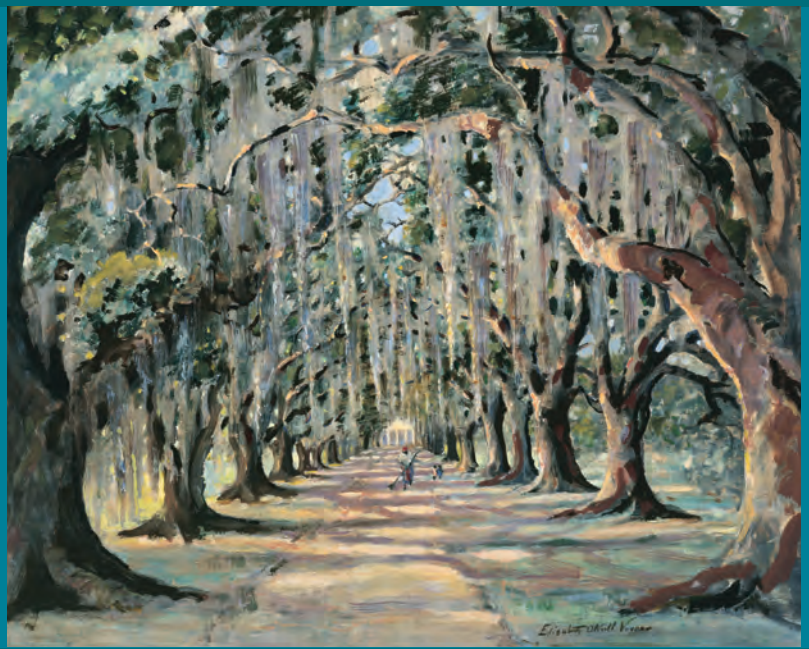

Stigma and caregiver burden among relatives of persons with schizophrenia  
Supported employment for people with mental illness and justice involvement  
An RCT of culturally adapted CBT for Chinese Americans with depression  
APA's 2015 Achievement Award winners: four outstanding programs
