# The Gravity of Weight

## A Clinical Guide to Weight Loss and Maintenance

Sylvia R. Karasu, M.D., and T. Byram Karasu, M.D.

Foreword by Albert J. Stunkard, M.D.

***The Gravity of Weight: A Clinical Guide to Weight Loss and Maintenance***, is a scholarly and critical inquiry into the field of overweight and obesity. Reviewing more than 900 publications, from some of the early classical papers to the most recent research, the authors have integrated the complex psychological and physiological aspects of the mind, brain, and body to explain why the control of body weight is so daunting for so many people.

Written primarily for clinicians in all health-related fields, including physicians, psychologists, nurses, social workers, and nutritionists, as well as for their intellectually curious patients,

***The Gravity of Weight*** explores the controversy regarding obesity as a disease with morbidity and mortality, as well as the complex methodological issues involved in obesity research. The authors delineate the extraordinary metabolic complexities implicated in weight control as well as the importance of circadian rhythms and sleep as they relate to weight and even disorders such as the night eating syndrome. They also investigate the psychological aspects of overweight and obesity, including discrimination against the obese and the fat acceptance movement, and they discuss some of the most common diets as well as the psychotherapeutic, pharmacological, and surgical treatment options currently available for these patients.

Drs. Karasu have drawn from both professional and personal experience to write ***The Gravity of Weight: A Clinical Guide To Weight Loss and Maintenance***. Both had fathers who suffered from morbid obesity. One died at the age of 56, while the other lived to be 91. The authors' professional curiosity led them to question how differences in environment, genetics, and overall physical and psychological health can affect one person's longevity and another's early passing.

In searching for the answers to some of the most perplexing questions regarding weight, the authors have created what is perhaps the most comprehensive exploration of the relationship of the mind, brain, body and our environment to overweight and obesity. The resulting text deserves a prominent place in the library of those who work in this field.

**2010 • 518 pages • ISBN 978-1-58562-360-0 • Paperback • \$66.00 • Item #62360**

AMERICAN  
PSYCHIATRIC  
ASSOCIATION  
PUBLISHING

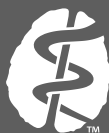

www.appi.org • Email: appi@psych.org • Phone: 1-800-368-5777

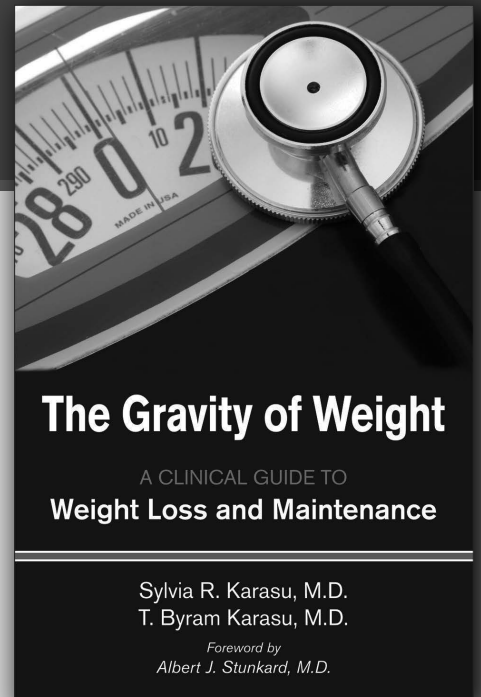

### The Gravity of Weight

A CLINICAL GUIDE TO  
**Weight Loss and Maintenance**

Sylvia R. Karasu, M.D.  
T. Byram Karasu, M.D.

Foreword by  
Albert J. Stunkard, M.D.

**20%** Discount for American Psychiatric Association Members!

**25%** Discount for APA Resident-Fellow Members

Just  
Published!

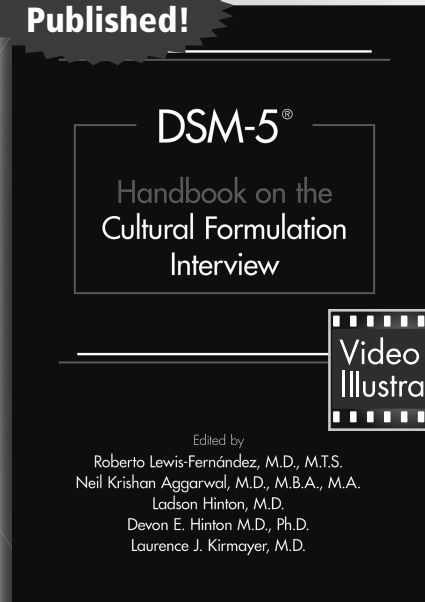

## DSM-5® Handbook on the Cultural Formulation Interview

Edited by Roberto Lewis-Fernández, M.D., M.T.S.,  
Neil Krishan Aggarwal, M.D., M.B.A., M.A.,  
Ladson Hinton, M.D., Devon E. Hinton M.D., Ph.D.,  
and Laurence J. Kirmayer, M.D.

*DSM-5® Handbook of the Cultural Formulation Interview* provides the background, context, and detailed guidance necessary to train clinicians in the use of the Cultural Formulation Interview (CFI), which was created as part of the 2007-2013 DSM revision process. The purpose of the CFI—and this unique handbook—is to make it easier for providers to account for the influence of culture in their clinical work to enhance patient-clinician communication and improve outcomes.

Cultural psychiatry as a field has evolved enormously from the days when it was principally concerned with epidemiological and clinical studies of disease prevalence; it now examines a multitude of issues, primary among them the differing patient, family, and practitioner models of illness and treatment experiences within and across cultures. The editors, all of whom have been intimately involved in the evolution of the field, have designed the book and accompanying videos for maximum instructional and clinical utility.

The *Handbook* boasts many strengths and useful features, including:

- A detailed description of each of the three CFI components: a core 16-item questionnaire, which can be applied in any clinical setting with any patient by any mental health clinician; an informant version of the core CFI used to obtain information from caregivers; and 12 supplementary modules that expand on these basic assessments. This material facilitates implementation of the CFI by clinicians.
- Over a dozen clinical vignettes are included to illustrate use of the three components, and the *Handbook* also includes multiple videos that demonstrate the application of portions of the core CFI, and several supplementary modules.
- Strategies for incorporating the CFI into clinical training are identified and discussed, furthering the objective of developing culturally-sensitive and astute practitioners.
- The theoretical bases of the CFI are explored, raising questions for discussion and identifying areas for further research.

The CFI is a valuable tool for all patients, not just those judged to be culturally different. The CFI has been called the single most practically useful contribution of cultural psychiatry and medical anthropology to clinical psychiatry, primary care, and medicine in general. *DSM-5® Handbook on the Cultural Formulation Interview* is the only book on the market that equips readers with the skills and insight to incorporate the CFI into practice, making it a critically important addition to the clinical literature.

2016 • 368 pages • ISBN 978-1-58562-492-8 • Paperback • \$65.00 • Item #62492

AMERICAN  
PSYCHIATRIC  
ASSOCIATION  
PUBLISHING

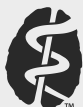

Order Online: [www.appi.org](http://www.appi.org)

Phone: 703-907-7322 • Toll Free: 1-800-368-5777

Email: [appi@psych.org](mailto:appi@psych.org)

20% Discount for American Psychiatric  
Association Members

25% Discount for APA Resident-Fellow Members AH1527A

# The Residents' JOURNAL

The American Journal of  
**Psychiatry**  
 Residents' Journal

September 2015                      Volume 10                      Issue 9

**Inside**

- 2 **Pediatric Neuropsychiatry: A Conceptual Framework**  
Aaron J. Hauptman, M.D.
- 3 **Advances in Differentiating Pediatric Bipolar Disorder From Attention Deficit Hyperactivity Disorder**  
Ross E. Goodwin, M.D.
- 6 **The Challenge of Diagnosing and Managing Attention Deficit Hyperactivity Disorder in the Traumatized Child**  
Muhammad Puri, M.D., M.P.H.
- 9 **Pediatric Anti-NMDA Receptor Encephalitis**  
Vanita Sahasranaman, M.D.
- 12 **A Patient With Guillain-Barré Syndrome Masquerading as Conversion Disorder**  
Taranjeet Singh Jolly, M.D.
- 15 **Delineating PANDAS/PANS Diagnosis**  
Jennifer Severe, M.D.
- 18 **Clinical Topics in Child and Adolescent Psychiatry**  
Reviewed by Venkata B. Kolli, M.B.B.S., M.R.C.Psych.
- 19 **Residents' Resources**

**IN THIS ISSUE**



This month's issue features articles on the topic of **Pediatric Neuropsychiatry**. In an editorial, Aaron J. Hauptman, M.D., discusses the relevance of utilizing the neuropsychiatric approach in the complex care of children. Ross E. Goodwin, M.D., examines diagnostic differences between pediatric bipolar disorder and attention deficit hyperactivity disorder (ADHD), emphasizing the deleterious effects of misdiagnosis. Muhammad Puri, M.D., M.P.H., analyzes the challenge of diagnosing ADHD in traumatized children. Vanita Sahasranaman, M.D., examines pediatric anti-N-methyl-D-aspartate encephalitis, including discussion on clinical presentation, pathophysiology, and treatment. Taranjeet Singh Jolly, M.D., investigates a case of Guillain-Barré syndrome masquerading as conversion disorder in an 8-year-old female patient. Jennifer Severe, M.D., provides discussion on delineating pediatric autoimmune neuropsychiatric disorders associated with streptococcal infections and pediatric acute-onset neuropsychiatric syndrome in the case of an 8-year-old patient. Lastly, Venkata B. Kolli, M.B.B.S., M.R.C.Psych., presents a review of *Clinical Topics in Child and Adolescent Psychiatry*.

|                                                               |                                                                                 |                                                                                                                                                                                 |
|---------------------------------------------------------------|---------------------------------------------------------------------------------|---------------------------------------------------------------------------------------------------------------------------------------------------------------------------------|
| <b>Editor-in-Chief</b><br>Rajiv Radhakrishnan, M.B.B.S., M.D. | <b>Guest Section Editor</b><br>Aaron J. Hauptman, M.D.                          | <b>Editors Emeriti</b><br>Sarah B. Johnson, M.D.<br>Molly McVoy, M.D.<br>Joseph M. Cerimele, M.D.<br>Sarah M. Fayad, M.D.<br>Monifa Seawell, M.D.<br>Misty Richards, M.D., M.S. |
| <b>Senior Deputy Editor</b><br>Katherine Pier, M.D.           | <b>Associate Editors</b><br>Rafik Sidaros, M.B.B.Ch.<br>Janet Charoensook, M.D. |                                                                                                                                                                                 |
| <b>Deputy Editor</b><br>Hun Millard, M.D., M.A.               | <b>Staff Editor</b><br>Angela Moore                                             |                                                                                                                                                                                 |

**Editor-in-Chief**  
 Rajiv Radhakrishnan, M.B.B.S., M.D.

**Senior Deputy Editor**  
 Katherine Pier, M.D.

**Deputy Editor**  
 Hun Millard, M.D., M.A.

**Associate Editors**  
 Rafik Sidaros, M.B.B.Ch.  
 Janet Charoensook, M.D.

*The Residents' Journal* accepts manuscripts authored by medical students, resident physicians, and fellows. To submit your paper, please visit the manuscript submission site at [mc.manuscriptcentral.com/appi-ajp](http://mc.manuscriptcentral.com/appi-ajp) and either create an account or use your existing account. For manuscript type, select "Residents." Then follow the instructions to upload your manuscript. Residents who are interested in participating as Guest Section Editors should e-mail *The Residents' Journal* Editor-in-Chief Rajiv Radhakrishnan at [rajiv.radhakrishnan@yale.edu](mailto:rajiv.radhakrishnan@yale.edu).

*The Residents' Journal* is sent free-of-charge to all psychiatry residents. Anyone interested in being included on the distribution list should contact Angela Moore, *The Residents' Journal* staff editor at [ajp@psych.org](mailto:ajp@psych.org) with "Subscribe to Residents' Journal" in the subject line.

To access the complete Residents' Journal archives, visit [ajp.psychiatryonline.org/residents\\_journal](http://ajp.psychiatryonline.org/residents_journal)

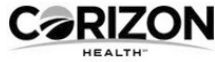

## Psychiatrists

### Outstanding opportunities at RIKERS ISLAND

Corizon is the nation's leading provider of healthcare services to correctional facilities. If you are looking for a full time, part time or prn position to subsidize your income then think about working for us.

As a Psychiatrist with Corizon you will enjoy work in a collegial atmosphere seeing a wide variety of cases, with ample opportunity for patient education and follow-up.

Excellent support staff PLUS employer benefits & malpractice coverage.

NY license & DEA

**Dee Thandi**

**Corizon Health**

**Talent Acquisition Specialist**

**T: 800-893-2118**

**F: 866-303-2728**

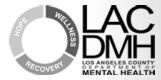

# Our work matters

"At the end of the day, when you work with the DMH... your job is rewarding, you're helping the people who need it the most."

*Sarjack Mehta, MD  
General Psychiatrist*

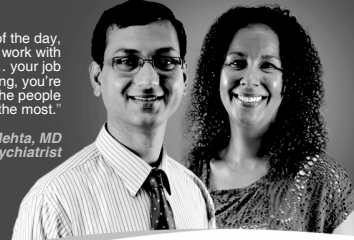

"DMH provides support for children and families who are often marginalized and underserved. Everyone deserves access to high quality mental health services, & I'm proud to be part of a system that is making that possible for families in Southern California."

*Kira Williams, MD  
Child Psychiatrist*

Join the largest, most dynamic mental health department in the nation. We are creating the future of mental health services, and we are seeking physicians who are ready to join our team and push the boundaries of traditional community practice.

To learn more about employment as a psychiatrist with the Los Angeles County Department of Mental Health, including salary and benefits, please visit:

[www.PsychiatristJobs.LA](http://www.PsychiatristJobs.LA)

**Psychiatric Services** (ISSN |1075-2730; online version, 1557-9700) is published monthly by the American Psychiatric Association, editorial and executive office, 1000 Wilson Blvd., Suite 1825, Arlington, VA 22209-3901. Copyright © 2015 by the American Psychiatric Association. Printed in U.S.A. Periodicals postage paid at Arlington, VA, and at additional mailing offices. POSTMASTER: Send address changes to **Psychiatric Services, 1000 Wilson Blvd., Suite 1825, Arlington, VA 22209-3901.**

## APA Seeks Editor-in-Chief, Books

The American Psychiatric Association (APA) is seeking applicants for the position of Editor-in-Chief, Books. The Editor-in-Chief works with the APA's Publisher, Associate Publisher, Editorial Board, and other APA administration members in the editorial development of print books and electronic products, implementing book program strategy, guiding content direction, soliciting and reviewing book proposals and manuscripts, reviewing backlist publications, and positing new frontlist titles. The current Editor-in-Chief concludes his final term on June 1, 2016.

Applicants must be APA members with knowledge of and experience in book publishing (digital and print), mental health research, and clinical care for people with mental illness. Applications are due by October 30, 2015. Candidates should submit their curriculum vitae and a cover letter outlining their qualifications by e-mail to [EditorBooksSearch@psych.org](mailto:EditorBooksSearch@psych.org). For further information, please contact Rebecca Rinehart, Publisher: [rinehart@psych.org](mailto:rinehart@psych.org), 703-907-7876.

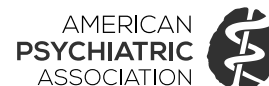

# DSM-5

## SELECTIONS

### DSM-5® Selections

American Psychiatric Association

These selections provide a comprehensive overview of the process of diagnosing disorders while serving as a reference guide to assist in the diagnosis of individual patients. The disorder-specific resource is an invaluable addition to the DSM-5® collection and an important contribution to the mental health profession.

This book contains the critical disorder-specific content from these four titles:

- Diagnostic and Statistical Manual of Mental Disorders, Fifth Edition (DSM-5®)
- DSM-5® Clinical Cases
- DSM-5® Self-Exam Questions
- DSM-5® Guidebook

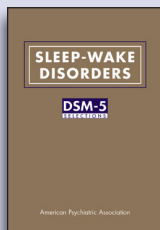

**Just Published!**  
**Sleep-Wake Disorders**  
DSM-5® Selections  
2015 • 160 pages  
ISBN 978-1-61537-009-2  
Paperback • \$39.00  
Item #37009

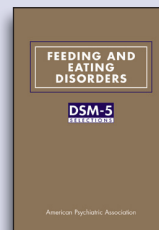

**Just Published!**  
**Feeding and Eating Disorders**  
DSM-5® Selections  
2016 • 81 pages  
ISBN 978-1-61537-012-2  
Paperback • \$39.00  
Item #37012

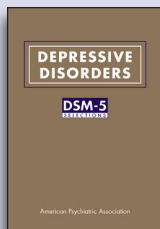

**Just Published!**  
**Depressive Disorders**  
DSM-5® Selections  
2015 • 118 pages  
ISBN 978-1-61537-010-8  
Paperback • \$39.00  
Item #37010

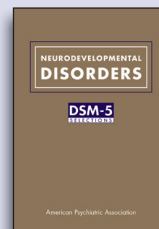

**Coming September 2015!**  
**Neurodevelopmental Disorders**  
DSM-5® Selections  
2016 • 161 pages  
ISBN 978-1-61537-013-9  
Paperback • \$39.00  
Item #37013

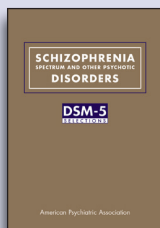

**Just Published!**  
**Schizophrenia Spectrum and Other Psychotic Disorders**  
DSM-5® Selections  
2015 • 116 pages  
ISBN 978-1-61537-011-5  
Paperback • \$39.00  
Item #37011

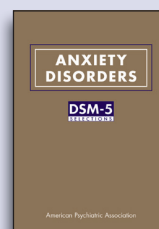

**Coming October 2015!**  
**Anxiety Disorders**  
DSM-5® Selections  
2016 • 110 pages  
ISBN 978-1-61537-014-6  
Paperback • \$39.00  
Item #37014

AMERICAN  
PSYCHIATRIC  
ASSOCIATION  
PUBLISHING

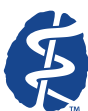

Order Online: [www.appi.org](http://www.appi.org)  
Phone: 703-907-7322  
Toll Free: 1-800-368-5777  
Email: [appi@psych.org](mailto:appi@psych.org)

20% Discount for American Psychiatric Association Members

25% Discount for APA Resident-Fellow Members AH1528A
