# There's So Much More to PSYCHIATRIC SERVICES Than Meets the Page!

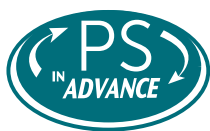

## Psychiatric Services in Advance

### Latest research reports!

#### Prevalence of ADHD Among Racial-Ethnic Groups in a Public Mental Health System

Although national studies have reported higher ADHD rates for white children than for children from other racial-ethnic groups, this study of children in New York State's public mental health system found lower rates for white children in nearly all age and gender groups.

#### Perception of Coercion Among Patients With a Community Treatment Order: A Review

Patients with a community treatment order (CTO) are more likely to feel coerced than voluntary patients, according to a literature review of 23 articles. But there are ways to mitigate perceived coercion, such as educating patients about the legal processes governing CTOs in their jurisdiction.

### Revisit the field's rich history!

#### 50 Years Ago in *Psychiatric Services*

- Review of APA Achievement Awards, 1949–1965
- Developing a School Program in a Hospital
- Dilemmas in Planning Discharge of Long-Term Patients
- High School Students as Ancillary Hospital Personnel

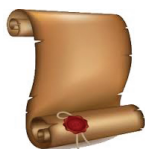

AMERICAN  
PSYCHIATRIC  
ASSOCIATION  
PUBLISHING

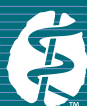

[ps.psychiatryonline.org](http://ps.psychiatryonline.org)

[www.appi.org](http://www.appi.org) • 1-800-368-5777 • Fax: 703-907-1091 • Email: [appi@psych.org](mailto:appi@psych.org)

Priority Code AH1520

## FREE Online Subscription to *Psychiatric Services* for APA Resident-Fellow Members (RFMs)!

American Psychiatric Association Resident-Fellow Members (RFMs) can receive a free online subscription to *Psychiatric Services*.

Simply visit [ps.psychiatryonline.org](http://ps.psychiatryonline.org) for full-text access to all of the content of APA's highly ranked, peer-reviewed monthly journal. *Psychiatric Services* focuses on service delivery in organized systems of care, evolving best practices, and federal and state policies that affect the care of people with mental illnesses.

Please visit [ps.psychiatryonline.org](http://ps.psychiatryonline.org) and log in with your American Psychiatric Association username and password.

Psychiatry residents who are not currently APA Resident-Fellow Members should consider membership in the American Psychiatric Association. The benefits provided to residents are an example of how the APA serves the needs of its members throughout their careers. The low introductory dues APA extends to RFMs are even waived for the first year. Please visit [www.psychiatry.org/joinapa](http://www.psychiatry.org/joinapa) for more information.

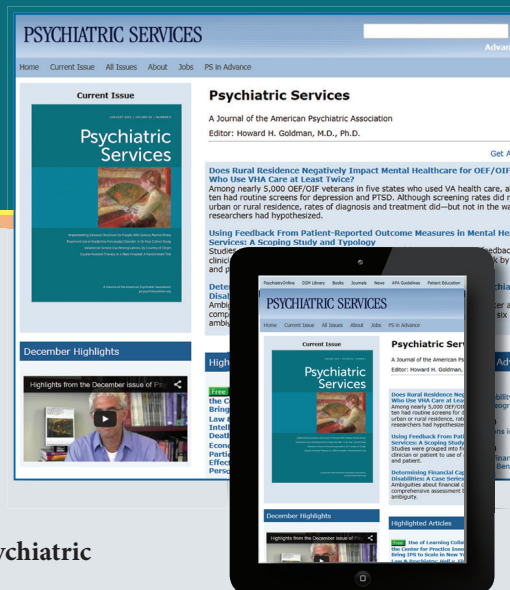

[ps.psychiatryonline.org](http://ps.psychiatryonline.org)

AMERICAN  
PSYCHIATRIC  
ASSOCIATION  
PUBLISHING

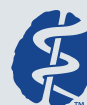

[www.appi.org](http://www.appi.org)  
Email: [appi@psych.org](mailto:appi@psych.org)  
Toll-Free: 1-800-368-5777

AH1507A
